# Supplementary material for: Variation in benthic long-term data of transitional waters: Is interpretation more than speculation?
Source: PLoS One. 2017 Apr 19;12(4):e0175746. doi: 10.1371/journal.pone.0175746 (PMC5396916; doi:10.1371/journal.pone.0175746)
Supplement: S1 Table — (XLSX) [file pone.0175746.s002.xlsx]

## Sheet: Abiotic variables
Variable	Observed/Modelled*	Description	Variables tested for each station after removing highly correlated independent environmental variables (Draftsmans plot, lrl ≥ 0.90)
			stn. 012	stn. 030	stn. 109
NAOI (Winter)	Observed	North Atlantic Oscillation index (NAOI) for winter	X	X	X
oxygen-minimum	Observed	Annual minimum oxygen concentration (ml/l)	X	X	X
salinity-maximum	Observed	Annual maximum of salinity	X	X	X
salinity-minimum	Observed	Annual minimum of salinity	X	X	X
oxygen-days below 2ml/l	Modelled	Number of days per year with modelled oxygen concentration below 2 ml/l	X	X
oxygen-days below 1ml/l	Modelled	Number of days per year with modelled oxygen concentration below 1 ml/l	X	X	X
oxygen-days below 50%	Modelled	Number of days per year with modelled oxygen saturation below 50%	X	X
oxygen-days below 20%	Modelled	Number of days per year with modelled oxygen saturation below 20%
days with salinity below 10%-percentil	Modelled	The 10% percentiles over the entire simulation period was computed and the number of days per year below the 10%-percentile were calculated	X	X	X
days with salinity above 90%-percentil	Modelled	The 90% percentiles over the entire simulation period was computed and the number of days per year above the 90%-percentile were calculated	X	X	X
Salt_monthly_anomaly_annual_mean	Modelled	The salinity long-term median value was computed and the mean deviation of monthly values per year was calculated	X	X	X
Salt_monthly_anomaly_annual_maximum	Modelled	The salinity long-term median value was computed and the maximum deviation of monthly values per year was calculated	X	X	X
NAOI (Winter) previous year	The previous year values of same variables as above, treated as additional independent variables		X	X	X
oxygen-minimum previous year			X	X	X
salinity-maximum previous year			X	X	X
salinity-minimum previous year			X	X	X
oxygen-days below 2ml/l previous year			X	X
oxygen-days below 1ml/l previous year			X	X
oxygen-days below 50% previous year			X	X	X
oxygen-days below 20% previous year
days with salinity below 10%-percentil previous year			X	X	X
days with salinity above 90%-percentil previous year			X	X	X
Salt_monthly_anomaly_annual_mean previous year			X	X	X
Salt_monthly_anomaly_annual_maximum previous year			X	X	X
* Observational data is derived from the monitoring and IOW`s database (Feistel et al., 2016).
