# Supplementary material for: Variation in benthic long-term data of transitional waters: Is interpretation more than speculation?
Source: PLoS One. 2017 Apr 19;12(4):e0175746. doi: 10.1371/journal.pone.0175746 (PMC5396916; doi:10.1371/journal.pone.0175746)
Supplement: S2 Table — (XLSX) [file pone.0175746.s003.xlsx]

## Sheet: Sheet1
Year	abundance-012	abundance-030	abundance-109	biomass-012	biomass-030	biomass-109	species-012	species-030	species-109	abundance-anomaly-012	biomass-anomaly-012	species-anomaly-012	abundance-anomaly-030	biomass-anomaly-030	species-anomaly-030	abundance-anomaly-109	biomass-anomaly-109	species-anomaly-109	Margalef (d)-anomaly-012	Pilou (J')-anomaly-012	Hurlbert (ES(50))-anomaly-012	Shannon (H'log2)-anomaly-012	Margalef (d)-anomaly-030	Pilou (J')-anomaly-030	Hurlbert (ES(50))-anomaly-030	Shannon (H'log2)-anomaly-030	Margalef (d)-anomaly-109	Pilou (J')-anomaly-109	Hurlbert (ES(50))-anomaly-109	Shannon (H'log2)-anomaly-109	NAOI (Winter)	oxygen-minimum-012	salinity-maximum-012	salinity-minimum-012	oxygen-minimum-030	salinity-maximum-030	salinity-minimum-030	oxygen-minimum-109	salinity-maximum-109	salinity-minimum-109	oxygen-days below 2ml/l-012	oxygen-days below 1ml/l-012	oxygen-days below 2ml/l-030	oxygen-days below 1ml/l-030	oxygen-days below 2ml/l-109	oxygen-days below 1ml/l-109	oxygen-days below 50%-012	oxygen-days below 20%-012	oxygen-days below 50%-030
1980		828	801		8.86	8.179		13	9				-0.604777	-0.236936	-0.309303	0.406638	0.866409	0					-0.215283	0.123719	0.00708898	0.0316457	-0.11642	0.00861294	-0.00100048	0.0164115	0.5				2.33	20.92	8.6				190	123	0	0	16	1	240	161	0
1981		1012	241		9.37	5.078		12	6				-0.517627	-0.21263	-0.344065	-0.114977	0.659401	-0.176091					-0.265767	0.105271	-0.0393124	-0.000591884	-0.23471	0.000709535	-0.157395	-0.0801326	2				5.24	14.29	9.61				140	101	0	0	5	0	190	118	0
1982		1357	125		11.797	1.658		18	12				-0.390228	-0.112598	-0.167973	-0.400084	0.173293	0.124939					-0.0948044	-0.0132562	-0.0910118	-0.0535993	0.163039	0.097395	0.181853	0.158574	0.7				3.24	17.73	8.05	0.48	17.32		198	102	0	0	18	1	252	142	0
1983	157	911	53	3.701	12.602	0.591	11	13	6	-0.50253	-0.537621	-0.134699	-0.563289	-0.0839305	-0.309303	-0.772718	-0.274704	-0.176091	-0.0626599	0.0828633	0.00435751	0.0150279	-0.221405	0.0894319	-0.0618893	-0.00266985	-0.0944886	0.0333624	-0.0903756	-0.0473442	3.4	0.31	27.4	19.96	2.64	18.69	11.16	2.07	18.09	12.91	55	27	0	0	29	9	142	38	0
1984	255	1652	51	19.439	36.173	3.351	13	14	4	-0.29189	0.182734	-0.0621479	-0.304797	0.374015	-0.277118	-0.789424	0.478883	-0.352183	-0.0232278	0.109675	0.0694162	0.0710931	-0.223134	-0.0208546	-0.0838137	-0.100548	-0.31199	0.0520261	-0.266467	-0.140088	1.5	2.07	23.47	15.21	5.36	15.04	8.57	1.1	19.03	15.75	150	74	0	0	0	0	229	105	0
1985			643.65			2.55032			6							0.311655	0.360303	-0.176091									-0.257448	-0.183311	-0.217346	-0.264066	-0.7	3.27	28.22	16.15	5.11	16.04	9.64	1.88	19.21	11.04	136	78	0	0	30	6	235	90	0
1986	190	793	77	2.888	8.365	4.628	6	11	7	-0.419676	-0.645342	-0.39794	-0.623534	-0.261904	-0.381853	-0.610504	0.619102	-0.109144	-0.379839	0.0929649	-0.216935	-0.101466	-0.291652	0.101914	-0.073534	-0.0195068	-0.0543207	0.059314	-0.0284836	0.0143937	0.4	1.29	26.74	14.29	6.19	13.04	8.76	2.32	21.09	12.67	137	80	0	0	5	0	222	97	0
1987		361	54		1.071	0.787		9	8				-0.9653	-1.15458	-0.469003	-0.764601	-0.150317	-0.0511525					-0.334264	0.0494354	-0.143989	-0.109779	0.0497628	0.0641395	0.0345088	0.0479945	-0.8	2.26	26.94	15.22	5.18	17.66	8.39	1.48	16.11	14.7	156	102	0	0	7	2	234	123	0
1988	482	74	400	13.214	3.921	0.325776	18	5	10	-0.0153829	0.0150947	0.0791812	-1.65358	-0.590973	-0.724276	0.105066	-0.533373	0.0457575	0.0807622	0.0358984	0.0961795	0.0491336	-0.498961	-0.0812154	-0.323373	-0.375885	-0.0178444	-0.250424	-0.0745271	-0.222483	0.6	2.57	29.49	14.9	1.93	20.68	8.09	0.67	17.77	12.6	172	89	0	0	5	0	311	116	1
1989	679	3633	18	23.2	1.82	0.151	14	12	3	0.13344	0.259548	-0.0299632	0.0374579	-0.924299	-0.344065	-1.24172	-0.867314	-0.477121	-0.0591611	0.0255031	-0.045099	-0.000788909	-0.339411	-0.104588	-0.285098	-0.210465	-0.354408	0.0984341	-0.391406	-0.194831	5.1	0.11	20.61	14.97	4.02	15.12	9.23	2.01	17.51	12.61	109	72	0	0	29	2	167	83	0
1990	371	5264	174	19.396	9.437	0.219	15	13	8	-0.129056	0.181773	0	0.198508	-0.209536	-0.309303	-0.256445	-0.705847	-0.0511525	0.0151285	0.0633618	0.0639386	0.0482881	-0.321036	-0.150671	-0.326928	-0.242853	-0.0619345	-0.0866179	-0.0602484	-0.10289	4	2.31	23.34	16.59	4.36	19.18	8.17	2.23	19.32	14.14	93	37	0	0	12	0	151	61	0
1991	321.637	10398	1075.47	5.13214	47.8383	3.7599	11	22	7	-0.191063	-0.395641	-0.134699	0.494141	0.495406	-0.0808232	0.534605	0.528885	-0.109144	-0.120338	0.00254272	-0.0521916	-0.0653733	-0.111138	-0.233388	-0.28235	-0.244408	-0.260268	-0.426462	-0.285101	-0.471438	0.9	1.23	24.3	15.62	3.81	15.99	7.94	1.55	17.94	12.18	121	65	0	0	28	6	224	86	0
1992	494.34	12719.4	784	10.0719	9.77482	1.11248	7	13	5	-0.00440447	-0.10283	-0.330993	0.581659	-0.194261	-0.309303	0.397322	0	-0.255273	-0.37337	-0.11627	-0.318151	-0.274877	-0.36336	-0.32509	-0.357427	-0.417138	-0.416074	-0.542385	-0.359997	-0.669844	3.3	0.68	25.98	14.15	2.81	14.81	8.79	2.97	16.24	13.46	128	88	0	0	26	15	174	102	1
1993	342.623	4302.72	588.05	12.2753	25.2082	0.67934	14	16	6	-0.163614	-0.0169058	-0.0299632	0.110936	0.217172	-0.219126	0.27242	-0.214204	-0.176091	-0.011166	-0.00345645	-0.00712917	-0.0296818	-0.213584	0.00336925	-0.125023	-0.0549397	-0.300143	-0.372737	-0.227648	-0.453576	2.6	2.26	23.14	13.36	3.07	21.74	8.68	2.76	23.14	11.65	130	93	0	0	0	0	165	105	0
1994	1699.69	11384.4	44.0252	7.8031	35.5485	0.581824	18	19	5	0.531939	-0.213673	0.0791812	0.533501	0.366451	-0.144492	-0.853293	-0.2815	-0.255273	0	-0.0231094	0.0282568	-0.00988525	-0.182282	-0.0625384	-0.118567	-0.094808	-0.170439	0.0950241	-0.169557	-0.0323455	3	1.27	27.39	12.12	2.57	21.16	8.03	1.66	19.26	14.69	122	88	0	0	9	0	195	104	0
1995	238.994	8214.29	37.7358	11.8071	29.7628	2.09642	11	28	6	-0.320043	-0.0337961	-0.134699	0.391762	0.289304	0.0239122	-0.92024	0.275186	-0.176091	-0.0973854	0.0828633	-0.0073611	0.0150279	0.00923286	-0.0749001	-0.0574997	-0.053432	-0.0555804	0.0939768	-0.0903756	0.0131047	4	2.79	22.62	13.39	2.14	14.33	8.75	2.19	19.47	11.71	123	62	0	0	56	17	176	96	0
1996	1088		50	4.0193		0.41963	19		7	0.338199	-0.501789	0.102662				-0.798024	-0.423425	-0.109144	0.0517223	0.035311	0.0269725	0.0566697					-0.00868898	0.0803238	-0.0234288	0.0353903	-3.8	2.9	26.74	19.08	3.82	19.88	7.9	1.98	18.03	13.44	136	66	0	0	0	0	251	107	0
1997	2266.04	8306.72	375.472	30.2496	48.1029	0.974811	29	28	13	0.656837	0.37478	0.286307	0.396622	0.497801	0.0239122	0.0775829	-0.0573709	0.159701	0.200302	-0.090628	0.0383964	-0.0110156	0.00879762	-0.0144434	0.00167843	0.00704039	0.111696	-0.0558079	0.0567336	0.0191481	-0.2	2.27	26.15	14.66	2.57	17.77	8.18	2.23	18.47	14.33	90	38	0	0	34	9	162	55	0
1998	1819.61	6699.07	562.604	8.02113	48.416	8.12447	20	26	12	0.561548	-0.201704	0.124939	0.303207	0.500619	-0.00827253	0.253208	0.863503	0.124939	0.0445775	-0.0090186	0.022664	0.0198737	-0.0141516	-0.0311244	-0.0375669	-0.0193522	0.0460349	0.0210794	0.0660726	0.0823375	0.6	2.88	23.3	16.71	5.04	17.15	8.49	3.16	17.56	12.62	101	60	0	0	1	0	203	70	0
1999	636.075	3504.6		37.7298	32.5381		14	21		0.105079	0.470745	-0.0299632	0.0218308	0.328022	-0.101027				-0.0543957	0.0458786	0	0.0195724	-0.0778207	0.0330102	-0.0173261	0.015398					1.7	2.01	28.85	15.05	2.69	21.54	7.9	2.36	18.05	11.75	125	88	0	0	0	0	203	101	0
2000	3886.65	4274.9	69.1824	40.4341	27.0675	8.12906	25	25	9	0.891145	0.500809	0.221849	0.108119	0.248078	-0.0253059	-0.656999	0.863749	0	0.10411	-0.207448	-0.156665	-0.147423	-0.00897953	0.0305581	0.0229276	0.0371103	0.0814876	0.103732	0.0830049	0.111524	2.8	1.26	26.94	16.59	3.48	17.54	8.65	2.12	17.84	13.06	85	74	0	0	57	28	108	76	6
2001	2244.99	4019.8	266.792	14.1792	17.531	0.955557	24	30	12	0.652785	0.0457136	0.20412	0.0813973	0.0594371	0.0538754	-0.0708208	-0.066035	0.124939	0.115621	-0.0600003	0.0155482	-0.0055527	0.0764075	0.0171114	0.0733261	0.0475725	0.101273	-0.0612248	0.0722883	0	-1.9	1.77	26.86	16.49	2.63	17.5	8.46	1.37	16.76	13.12	116	98	1	0	28	23	153	103	4
2002	81.6164	3360.34	597.34	8.53261	18.517	0.891541	4	31	13	-0.786653	-0.174858	-0.574031	0.00357576	0.0832016	0.0681158	0.279227	-0.0961502	0.159701	-0.521677	-0.135958	-0.386682	-0.441819	0.100568	0.0583976	0.154986	0.0930781	0.0794124	-0.131557	0.0611985	-0.0565553	0.7	0.52	21.59	15.77	4.81	15.58	8.22	2.18	15.59	12.97	149	124	0	0	16	1	208	133	9
2003	635.931	2471.18	599.195	13.5347	10.2821	2.20132	16	37	15	0.10498	0.0255096	0.0280287	-0.129902	-0.17229	0.144956	0.280574	0.296392	0.221849	0.00809677	0.028976	0.0725156	0.0242189	0.196631	0.0405309	0.157334	0.0969987	0.146722	-0.015297	0.0883136	0.0832799	0.2	2.7	24.75	15.78	4.12	18.92	8.6	0.89	22.82	14.98	137	112	0	0	41	26	169	121	2
2004	1817.03	1688.67	335.189	12.7626	6.50336	1.9428	27	29	11	0.560933	0	0.255273	-0.295262	-0.371232	0.0391521	0.028295	0.242136	0.0871502	0.181068	-0.0581013	0.085821	0.012125	0.109062	0.0791812	0.136349	0.105316	0.0420229	-0.0645764	0.0492936	-0.0188389	-0.1	2.02	24.86	15.5	4.98	17.75	8.6	2.99	19.43	14.98	140	130	0	0	85	35	170	131	2
2005	295.415	1967.59	207.403	48.5814	13.0864	3.35195	8	30	10	-0.227997	0.58053	-0.273001	-0.228874	-0.0675497	0.0538754	-0.18018	0.479006	0.0457575	-0.266517	-0.0199606	-0.187367	-0.149642	0.115467	0.0505809	0.133885	0.0809766	0.033886	-0.0305173	0.056682	-0.00247788	0.1	0.56	27.04	14.63	2	18.33	8.58	1.52	22.27	12.89	174	140	0	0	30	7	222	151	2
2006	368.635	2483.18	332.189	8.00296	13.4398	1.50959	13	35	17	-0.131833	-0.202689	-0.0621479	-0.127799	-0.0559762	0.120822	0.0243905	0.132568	0.276206	-0.0498952	0.0434627	-0.0103876	0.00485951	0.171824	-0.107178	0.0229276	-0.0574642	0.246237	0.0564135	0.230808	0.174632	-1.2	2.4	27.46	16.22	4.75	20.5	8.49	2.25	17.21	15.42	124	100	0	0	7	0	163	106	0
2007	2511.29	3214.88	110.918	51.5206	17.034	0.899	25	30	8	0.701467	0.606042	0.221849	-0.015643	0.0469467	0.0538754	-0.451991	-0.0925317	-0.0511525	0.127686	-0.134218	-0.0335625	-0.0742594	0.0884141	0.0126664	0.119439	0.043043	-0.0190025	0	0	-0.0160689	2.8	2.24	19.97	13.1	4.39	13.42	8.54	2.63	17.7	11.53	112	86	0	0	80	47	141	96	0
2008	209.969	8314.12	341.05	16.4012	22.1158	0.628176	8	29	11	-0.376276	0.108937	-0.273001	0.397009	0.160333	0.0391521	0.0358241	-0.24821	0.0871502	-0.235688	0.0687283	-0.148369	-0.0609975	0.0246178	-0.1039	-0.00168495	-0.0778525	0.040256	-0.0377509	0.0247354	0.00791018	2.1	3.63	26.5	15.55	2.24	16.86	9.92	2.96	19.1	16.93	137	120	6	3	80	56	159	127	15
2009	2492.28	3781.51	650.799	34.1731	14.8872	0.937296	27	30	17	0.698166	0.427745	0.255273	0.0548578	-0.0115561	0.0538754	0.316452	-0.0744149	0.276206	0.163036	-0.0702212	0.0133418	0	0.0795021	-0.0246326	0.0754516	0.00572898	0.198534	-0.0703827	0.0728852	0.0478243	-0.5	2.22	27.03	13.95	4.27	15.44	8.54	2	17.7	12.02	143	105	1	1	79	45	178	116	11
2010	445.725	1645.48	90.5166	10.027	15.6901	0.974544	14	30	9	-0.0493631	-0.104769	-0.0299632	-0.306515	0.0112565	0.0538754	-0.540266	-0.0574902	0	-0.0280667	0.0305239	-0.01273	0.00423552	0.126233	0.0782783	0.167457	0.108783	0.0614814	0.0969692	0.0759558	0.104708	-4.7	1.22	26.52	12.76	2.45	17.83	9.63	0.63	17.41	10.39	116	88	1	0	15	5	153	104	9
2011	1653.23	3305.23	388.232	18.7921	24.5372	0.837895	20	30	11	0.519903	0.168035	0.124939	-0.00360545	0.205455	0.0538754	0.0920966	-0.123102	0.0871502	0.0503704	-0.111052	-0.0419724	-0.0821868	0.0867191	0.0569167	0.128602	0.0874324	0.0315698	-0.132841	-0.0310016	-0.0870446	-1.7	2.47	25	15.45	4.54	15.86	8.24	0.76	17.07	12.74	109	96	2	0	143	113	154	102	9
2012	945.675	2917.48	278.446	11.9306	21.8393	2.86973	22	27	9	0.277312	-0.0292786	0.166331	-0.057799	0.154868	0.00811789	-0.0522527	0.41155	0	0.127828	0	0.0861953	0.0424662	0.0460536	-0.0033956	0.0339529	0.0133953	-0.0394821	-0.170155	-0.0447919	-0.162434	3.2	2.63	24.79	15.82	2.99	14.76	8.36	1.02	16.9	12.97	181	142	2	1	151	111	206	160	8
2013	499.379	4481.17	314.047	9.73258	67.1317	0.409968	18	38	10	0	-0.117711	0.0791812	0.128584	0.642557	0.156538	0	-0.433542	0.0457575	0.0783886	0.0419024	0.083945	0.0551451	0.176387	-0.0590369	0.0148774	0.000591078	0	0.00820665	0.0434293	0.0364402	-2	1.79	27.29	12.08	2.57	20.38	7.75	0.78	20.06	14.56	133	109	0	0	108	76	162	120	8
2014	182.667	1904	424.667	11.1957	9.50334	1.67083	7	28	16	-0.436771	-0.056887	-0.330993	-0.243141	-0.206494	0.0239122	0.131054	0.176642	0.249877	-0.294428	-0.0644146	-0.215584	-0.222901	0.0865977	0.0384307	0.0964894	0.0599836	0.201161	0.0358214	0.201141	0.144632	3.1	2.0036	26.57	16.96	2.89	18.57	8.3	0.79	22.07	16.72	168	129	3	0	166	126	195	152	9
2015	840.907	4148.81	395.145	16.0796	13.5141	2.03779	22	32	16	0.226318	0.100335	0.166331	0.0951162	-0.0535824	0.0819041	0.0997621	0.262868	0.249877	0.135686	-0.0155771	0.0519628	0.0268942	0.103729	-0.0241317	0.0164994	0.0143978	0.206024	-0.0016007	0.134934	0.10724	3.6	1.63	21.89	15.23	3.16	19.86	9.02	2.52	22.72	14.5	103	71	1	0	52	42	139	85	3
[truncated: 15 more columns]
